# Supplementary material
Source: Springer Nature journal article supplement (https://www.springermedizin.de/resource/supplementary/12889_2011_3807_MOESM1_ESM.pdf/9490666)
Supplement: MOESM1 [file 9490666]

5551 Total Suicides from 1999 to 2008  
ICD 10 (X60 – X84, Y87.0)

Excluded 153 cases where  
underlying cause of death was  
suicide (ICD 10; X60 – X84,  
Y87.0), but manner was homicide

|                            | Males       | Females |
|----------------------------|-------------|---------|
| 1999                       | 1           | 1       |
| 2000                       | 74          | 7       |
| 2001                       | 44          | 3       |
| 2002                       | 7           | 1       |
| 2003                       | 2           | 0       |
| 2004                       | 0           | 0       |
| 2005                       | 0           | 0       |
| 2006                       | 5           | 2       |
| 2007                       | 2           | 0       |
| 2008                       | 3           | 1       |
| Total                      | 138         | 15      |
| Average age in years (SD): | 46 (20)     |         |
| Median age:                | 43 yrs      |         |
| Q1 (25%):                  | 31 yrs      |         |
| Q3 (75%):                  | 63 yrs      |         |
| Range:                     | 31 – 63 yrs |         |

Excluded 147 cases where  
county of death was unknown

|                            | Males       | Females |
|----------------------------|-------------|---------|
| 1999                       | 14          | 3       |
| 2000                       | 2           | 0       |
| 2001                       | 5           | 0       |
| 2002                       | 21          | 6       |
| 2003                       | 16          | 5       |
| 2004                       | 14          | 4       |
| 2005                       | 7           | 2       |
| 2006                       | 21          | 7       |
| 2007                       | 13          | 1       |
| 2008                       | 6           | 0       |
| Total                      | 119         | 28      |
| Average age in years (SD): | 43 (18)     |         |
| Median age:                | 42 yrs      |         |
| Q1 (25%):                  | 27 yrs      |         |
| Q3 (75%):                  | 53 yrs      |         |
| Range:                     | 15 – 94 yrs |         |

Excluded 9 cases where age  
was unknown

Excluded 5 cases where date  
of death was unknown

5237 Total Suicide cases in Kentucky from 1999 to 2008
